# Supplementary material for: Arginase-1 in Plasma-Derived Exosomes as Marker of Metastasis in Patients with Head and Neck Squamous Cell Carcinoma
Source: MDPI journal article supplement (doi:10.3390/cancers15225449), 2023-11-16
Supplement: s1 [file s1]

# Supplementary information for manuscript

## “Arginase-1 in plasma-derived exosomes as marker of metastasis in patients with head and neck squamous cell carcinoma”

**Supplementary Table S1.** Arg-1 H scores for patients’ tumors and recurrence status.<sup>1</sup>

| Patient # (Cohort 1) | Tumor Parenchyma | Tumor Stroma | Tumor Recurrence |
|----------------------|------------------|--------------|------------------|
| 1                    | 150              | 75           | No               |
| 2                    | 25               | ND           | Yes              |
| 3                    | 0                | 0            | Yes              |
| 4                    | 300              | 0            | No               |
| 5                    | 225              | 0            | No               |
| 6                    | 25               | 0            | Yes              |
| 7                    | 300              | 225          | Yes              |
| 8                    | 75               | 225          | No               |
| 9                    | 25               | 0            | Yes              |
| 10                   | 25               | 0            | No               |
| 11                   | 25               | 0            | Yes              |
| 12                   | 75               | 0            | Yes              |
| 13                   | 75               | 25           | No               |
| 14                   | 75               | 100          | No               |
| 15                   | 50               | 0            | Yes              |
| 16                   | 150              | 25           | No               |
| 17                   | 150              | 0            | No               |
| 18                   | 25               | 0            | Yes              |
| 19                   | 150              | 150          | No               |
| 20                   | 25               | 225          | Yes              |
| 21                   | 75               | 150          | No               |
| 22                   | 75               | 225          | Yes              |
| 23                   | 0                | 0            | No               |
| 24                   | 150              | 100          | No               |
| 25                   | 25               | 0            | Yes              |
| 26                   | 150              | 0            | No               |
| 27                   | 0                | 0            | No               |
| 28                   | 50               | 0            | No               |
| 29                   | 200              | 100          | No               |
| 30                   | 25               | 25           | Yes              |
| 31                   | 0                | 0            | No               |

<sup>1</sup> The H scores for the tumor parenchyma and the tumor stroma were calculated as described in Materials and Methods and are based on the IHC results in tissue sections of tumor specimens removed at surgery. Tumor recurrence within 4 years of last therapy is indicated.

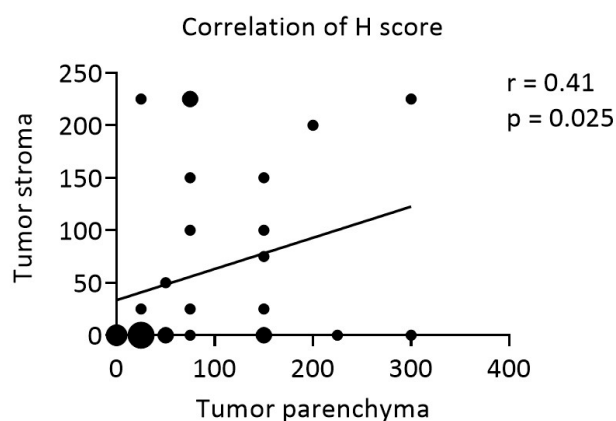

**Supplementary Figure S1.** Spearman correlation analysis of Arg-1 H scores between tumor parenchyma and tumor stroma.  $r$  = Spearman correlation coefficient.

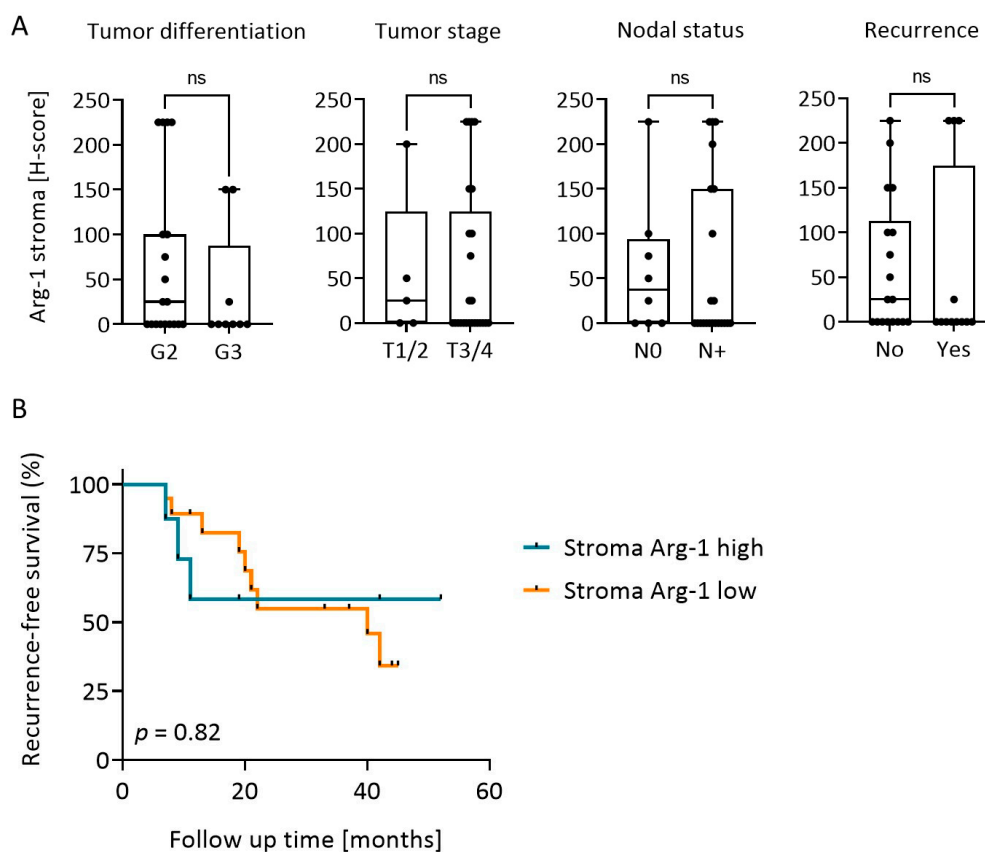

**Supplementary Figure S2.** Stroma Arg-1 expression in relation to clinical data and recurrence free survival (RFS). **(A)** Arg-1 H scores in tumor stroma of  $n = 31$  HNSCC patients, grouped according to tumor differentiation grade, tumor size, nodal status and development of recurrence. P-values were determined by Mann–Whitney test, with ns = not significant. **(B)** Kaplan–Meier plots with log-rank test for RFS of HNSCC patients with high vs low Arg-1 expression levels in tumor parenchyma.

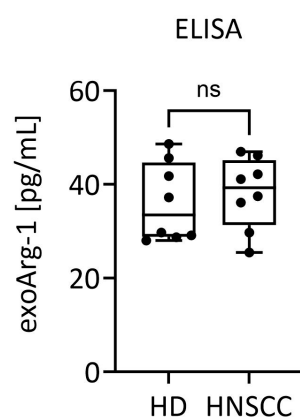

**Supplementary Figure S3.** Arg-1 levels in plasma-derived exosomes, as determined by ELISA assay upon exosome lysis, from n = 8 HD and n = 8 HNSCC patients. P-values were determined by Mann–Whitney test, with ns = not significant.

## Arginase-1 original Western Blots, exposure time 14.1 sec

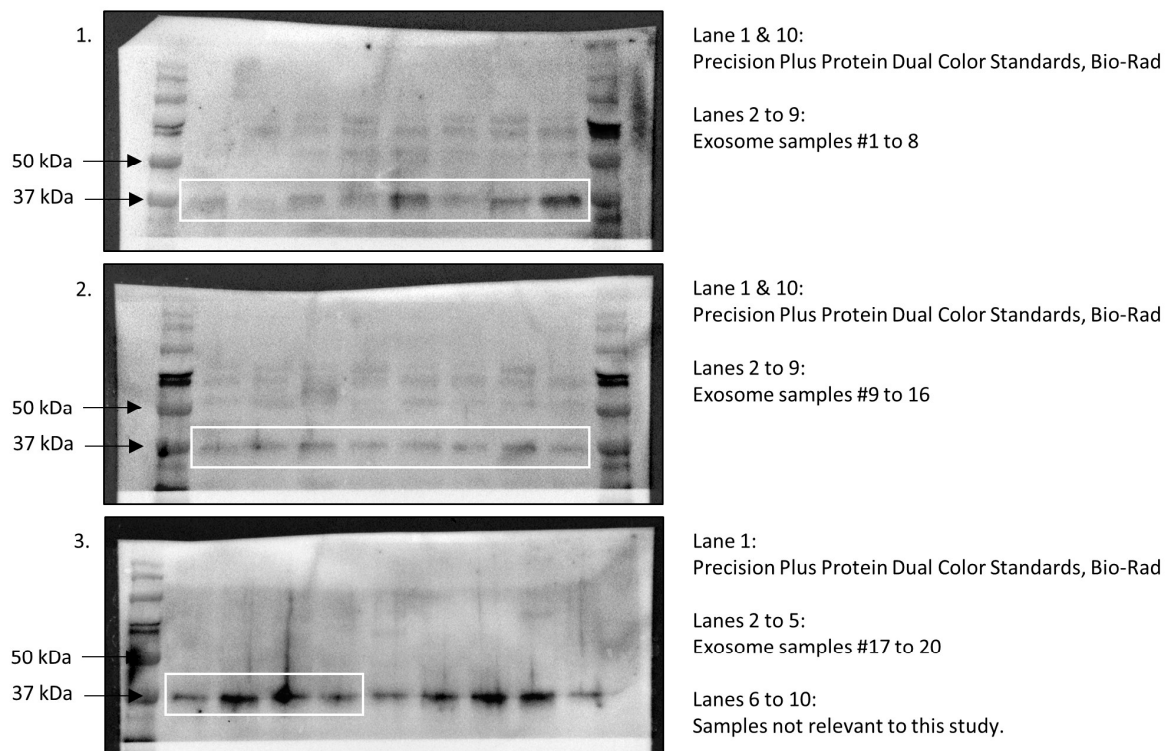

## TSG101 original Western Blots, exposure time 27 sec

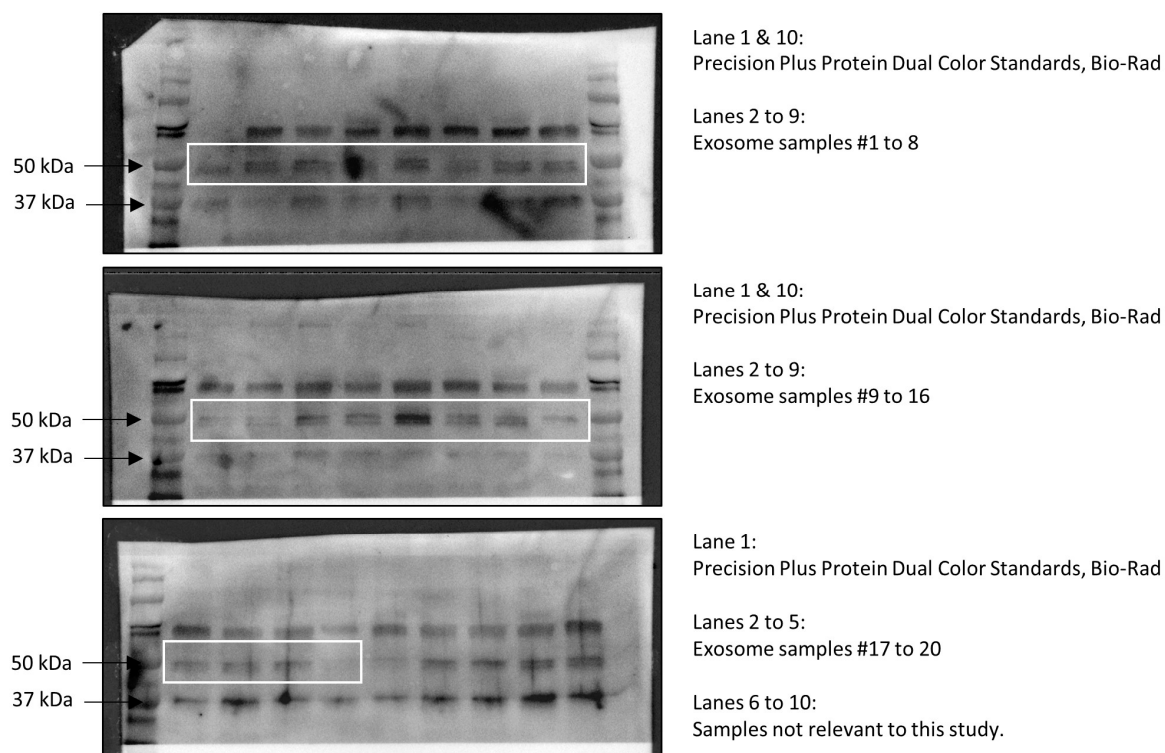

Supplementary Figure 4. Arginase-1 and TSG101 original Western Blots.

**Supplementary Table 2.** Background-corrected densitometry readings of Arginase-1 Western Blot.

| <b>Patient # (Cohort 2)</b> | <b>Arginase-1 band intensity</b> |
|-----------------------------|----------------------------------|
| HNSCC                       |                                  |
| 1                           | 884583                           |
| 2                           | 755055                           |
| 3                           | 764631                           |
| 4                           | 1249605                          |
| 5                           | 2026017                          |
| 6                           | 890190                           |
| 7                           | 1488501                          |
| 8                           | 2414538                          |
| 9                           | 939834                           |
| 10                          | 1548162                          |
| 11                          | 1458261                          |
| 12                          | 841680                           |
| 13                          | 968940                           |
| 14                          | 738675                           |
| 15                          | 1796382                          |
| 16                          | 880110                           |
| 17                          | 2937690                          |
| 18                          | 6277257                          |
| 19                          | 7246260                          |
| 20                          | 3568194                          |
| HD                          |                                  |
| 1                           | 1931462                          |
| 2                           | 1719900                          |
| 3                           | 2047500                          |
| 4                           | 1967212                          |
| 5                           | 1842906                          |
| 6                           | 2254434                          |
| 7                           | 1305824                          |
| 8                           | 3348852                          |
